# Supplementary material
Source: publisher figshare collection journal article supplement (https://acs.figshare.com/ndownloader/files/4683592)
Supplement: Supplementary file 1 [file 4683592]

WEB APPENDIX

**Table Web Appendix 1. Landfill Sites Included in this Study, Coordinates and Amounts of Different Waste Fractions Deposited during the Period 1994-2002.**

| Site | Coordinates | Waste amounts, ranges for 1994-2002 (ktons) | | | | Household waste,  annual average  (ktons) | Sludges,  annual average  (ktons) |
| --- | --- | --- | --- | --- | --- | --- | --- |
| Household waste | Park | Sludges | Industrial waste |  |  |
| Filborna (Helsingborg)a | 56º04 N, 12º46 E | 57.1-69.0 | Not reported | 1.8-3.8 | 42.6-82.0 | 63.31 | 2.78 |
| Heljestorp (Vänersborg) | 59º32 N, 17º38 E | 10.5-40.0 | 0-3.8 | 1.0-6.7 | 6.5-42.9 | 28.27 | 3.89 |
| Högbytorp (Upplands Bro) | 59º32 N, 17º38 E | 20.0-56.5 | 0.5-3 | 5-21 | 90-145.6 | 30.90 | 13.11 |
| Sundsvall | 62º23 N, 17º11 E | 4.0-10.6 | 0-0.2 | 1.6-8.0 | 19.0-48.2 | 7.55 | 4.18 |
| Hagby (Vallentuna)  *b* | 59º28 N, 17º58 E | 20 | Not reported | 4.6-5.0 | 58-120 | 20 | 4.78 |
| Visby *c* | 57º38 N, 18º21 E | 10.4-14.5 | 0-0.8 | 0.1-0.6 | 2.3-9.3 | 12.56 | 0.36 |

*a* all waste amounts are from 1992-2000

*b* closed 1995: waste amounts reported 1994-95

*c* closed 1998: waste amounts reported 1994-97

**Table Web Appendix 2.** Characteristics for Investigated Landfill Cover Soil Samples.

| **Landfill site** | **Sampling date** | **Loss on incineration 550°C (% of dry wt)** | **Moisture (water in % of wet weight) *a*** | **pH**  **(water)** |
| --- | --- | --- | --- | --- |
| Filborna | 2001.11.28 | 33.3 ± 3.2 *(n=8)* | 64.0 ± 6.2 | 5.8-6.2 |
| Heljestorp | 2002.05.23 | 31.5 ± 14.9 *(n=5)* | 46.0 ± 8.8 | *n. m.* |
| Högbytorp | 2002.04.11 | 8.2 ± 4.7 *(n=5)* | 29.1 ± 8.3 | 7.0-8.4 |
| Sundsvall | 2002.03.06 | 41.4 ± 11.4 *(n=4)* | 39.8 ± 6.4 | 6.7-7.2 |
| Hagby | 2002.04.25 | 3.9 ± 1.0 *(n=5)* | 16.5 ± 5.0 | 8.0-8.4 |
| Visby | 2002.06.07 | 9.0 ± 6.2 *(n=4)* | 25.1 ± 8.3 | 7.4-7.6 |

*n. m.* = not measured

*a* = same number of samples as loss on incineration

FIGURE Web Appendix 1. Linear regression analysis of the fractionation factor α as a function of temperature for six landfill cover soils. (A) Filborna: 1.0204-0.000098x, r=0.16; (B) Hagby: 1.0266-0.000304x, r=0.30; (C) Heljestorp: 1.0358-0.000664x, r=0.58; (D) Högbytorp: 1.0233-0.000220x, r=0.22; (E) Sundsvall: 1.0243-0.000353x, r=0.42; (F) Visby: 1.0208-0.000239x, r=0.38.
